# Supplementary material
Source: ML conference proceedings conference paper supplement (https://openreview.net/forum?id=c7SApXZz4b)
Supplement: supplementary_material [file attachment]

## 433 Appendix

434 The appendix is organized as follows. First, we include the licenses and links to the dataset. Then  
435 we provide the cardinality of the old WRENCH dataset for reference. In the following sections, we  
436 further discuss the limitation and the broader societal impact on our public respectively. Next, we  
437 include the result reported from Zhu et al. [2023] and an extended table for Section 4.4. Next, we  
438 described all the existing pipeline functionality of our code-base. We also presented the graph of  
439 massive multi-languages. Which showed the crossover points for Chinese, Norwegian, and Japanese.

### 440 A Dataset Licenses

441 The license information for each dataset is provided below.

- 442 • **Banking77**: CC-BY-4.0  
443 <https://huggingface.co/datasets/legacy-datasets/banking77>
- 444 • **ChemProt**: Apache-2.0  
445 <https://github.com/JieyuZ2/wrench>
- 446 • **Claude9**: CC-BY-4.0  
447 [https://huggingface.co/datasets/coastalcph/lex\\_glue](https://huggingface.co/datasets/coastalcph/lex_glue)
- 448 • **Massive18**: CC-BY-4.0  
449 <https://huggingface.co/datasets/AmazonScience/massive>
- 450 • **Amazon31**: No longer available publicly  
451 [https://huggingface.co/datasets/defunct-datasets/amazon\\_us\\_reviews](https://huggingface.co/datasets/defunct-datasets/amazon_us_reviews)

### 452 B Cardinality of WRENCH Dataset

- 453 • IMDB: 2
- 454 • ChemProt: 10
- 455 • TREC: 6
- 456 • Yelp: 2
- 457 • Semeval: 9
- 458 • AgNews: 4

### 459 C Limitations of Our Work

460 There are several limitations to this work.

- 461 • The authors who wrote the LFs for the dataset are computer science students with little to  
462 no background in the corresponding fields such as chemical engineering or finance. Thus,  
463 further improvement can be made with professionals with domain expertise.
- 464 • This paper only primarily evaluated the performance of Roberta’s (some other BERT variant)  
465 EM. Similarly, this paper only tested the performance of some relatively simple LMs such  
466 as Majority Vote, Dawid-Skene, and Snorkel. More complex and recent models could be  
467 tested using the pipeline.
- 468 • This paper fixed the number of steps and hyperparameter while training following settings  
469 from Zhu et al. [2023]. With proper early stopping and hyperparameter search, WS has the  
470 potential to achieve better results.
- 471 • The Massive dataset has one-to-one correspondence across languages, while in real-life  
472 scenarios, distribution shifts among different languages even on identical tasks. Thus  
473 multi-lingual dataset collected from real uses would be more effective in evaluating the  
474 performance

Table 3: Additional test accuracy for Amazon31 and Banking77. Best results are **Bolded**.

|                  | 6.25% VALIDATION     | 12.5% VALIDATION     | 25% VALIDATION       | 50% VALIDATION       | 100% VALIDATION      |
|------------------|----------------------|----------------------|----------------------|----------------------|----------------------|
| <b>BANKING77</b> |                      |                      |                      |                      |                      |
| +MAJORITY VOTE   | <b>0.5652±0.0262</b> | <b>0.6665±0.0152</b> | <b>0.7519±0.0150</b> | <b>0.8218±0.0098</b> | <b>0.8654±0.0023</b> |
| +SUPERVISED ONLY | 0.2362±0.0155        | 0.3777±0.0199        | 0.5705±0.0176        | 0.7522±0.0041        | 0.8488±0.0065        |
| <b>AMAZON31</b>  |                      |                      |                      |                      |                      |
| +MAJORITY VOTE   | <b>0.6850±0.0046</b> | <b>0.7103±0.0066</b> | <b>0.7429±0.0028</b> | <b>0.7706±0.0032</b> | <b>0.7923±0.0016</b> |
| +SUPERVISED ONLY | 0.6603±0.0078        | 0.6999±0.0056        | 0.7357±0.0026        | 0.7673±0.0033        | 0.7902±0.0012        |

## 475 D Broader Social Impact of WS Benchmarking

476 This work would have a positive societal impact. This benchmark provides a platform to evaluate the  
 477 WS method on a more realistic dataset. Methods with successful performance are more likely to be  
 478 useful in real applications, thus improving the effectiveness of the WS model training process and  
 479 reducing the cost and resources required.

480 However, a potential negative societal impact is that since all of our datasets and codes are publicly  
 481 available, people with malicious intent can easily use the datasets. In addition, WS makes it possible  
 482 for these individuals to train models at a relatively lower cost, leading to potentially harmful impacts.

## 483 E Reproducing Zhu et al. [2023].

484 We reproduce the results in Zhu et al. [2023], we also pointed out that their graphs may be misleading.  
 485 In the graph, they claim that their data are stratified, while for several datasets only the unstratified  
 486 data can achieve the same accuracy. The graphs claim that the data are stratified; however, for several  
 487 datasets, only the unstratified data achieves the reported accuracy. Although this discrepancy is  
 488 mentioned in a small part of their text, it seems to have been obscured, and the text on the graph does  
 489 not clarify this.

490 We present our reproduction of their results in Table 4.

## 491 F Extended Table for Section 4.4

492 This is an extension to the table in the Section 4.4 with some results on Amazon31 and Banking77.  
 493 See Table 3.

## 494 G Pipeline Functionality

- 495 • **oracle**: It uses all the training data of the dataset with ground truth labels and trains a  
 496 supervised model on it.
- 497 • **end-to-end**: It uses all the labeled validation data and unlabeled training data. It first trains  
 498 a weakly supervised model to create weak labels for all the training data, and aggregates to  
 499 get strong labels that get piped into a fully supervised end model.
- 500 • **val-as-train**: It takes a range of numbers/proportions of the labeled validation data and  
 501 trains a supervised model just on those subsampled validation data.
- 502 • **train-as-train**: It takes a range of numbers/proportions of the training data (with ground  
 503 truth), and trains a supervised model just on those subsampled validation data.
- 504 • **saturation** These experiments require oracle experiment of the same dataset and supervised  
 505 model to be run first. Then it performs a binary search on the number/proportion of labelled  
 506 data required to match the oracle performance.
- 507 • **fine-tune-on-val** This experiment is based on the end-to-end experiment, and performs an  
 508 additional step of fine-tuning on the trained supervised model with the labeled validation  
 509 dataset.

Table 4: Replication Results

| Dataset  | Paper N = 50<br>(baseline/before/after) | Paper N = 5<br>(baseline/before/after) | Ours N = 50<br>(baseline/before/after) | Ours N = 5<br>(baseline/before/after) |
|----------|-----------------------------------------|----------------------------------------|----------------------------------------|---------------------------------------|
| AGNEWS   | 88/87.2/88.2                            | 77/84/84.1                             | 87.5(0.7)/85.9(1)/87.1(1.7)            | 76.9(4)/86.3(0.9)/82(3)               |
| Yelp     | 95/82/91                                | 74/76/84                               | 94.7(0.6)/86.8(4.3)/94.3(7.5)          | 76.7(5.6)/84.3(7.2)/91.5(1.4)         |
| IMDb     | 88/81.8/86.4                            | 70.5/79.5/79.7                         | 86.8(3)/84.6(2.3)/88.9(0.7)            | 63(6.4)/81.9(2.7)/79.4(5.4)           |
| TREC     | 93/68/94                                | 63/64/84                               | 91.1(1.4)/67.8(9.7)/91.04(1.3)         | 60.3(4.6)/66.2(3.6)/81.5(4)           |
| ChemProt | 72/55/73                                | 42/51/59                               | 70.7(1.63)/58.3(1.2)/73.71(0.69)       | 42(2.3)/51.8(3)/57.3(2.7)             |
| SemEval  | 86.2/82/91                              | 72/76/84                               | 85.5(0.37)/83.7(1.6)/91.6(7.7)         | 74.67(2.1)/83.6(0.6)/86.8(0.6)        |

510 **H Multi-Language Massive**

511 We provide the extended results for the massive datasets in Section 4.3. The results are gathered from 12 datasets, see Figure 7.

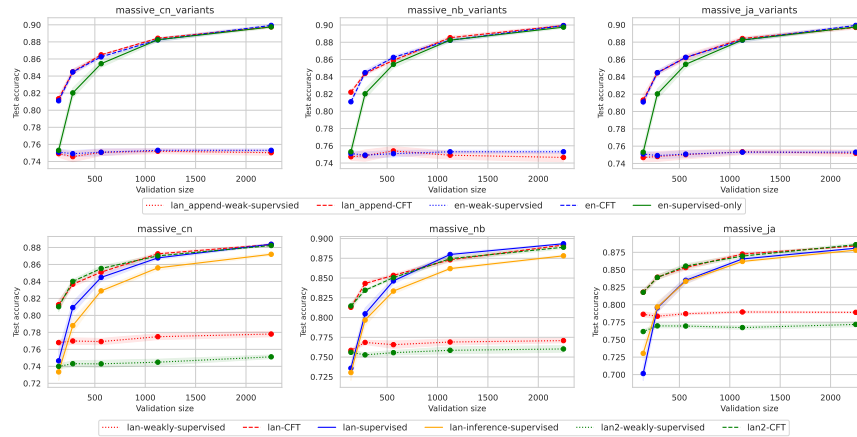

Figure 7: WS for Multi-Language Massive

512

513 **I Massive HC and Using English for Augmentation**

514 This section contains the results for a high cardinality version massive with 60 classes (Figure 8), as well as a more realistic use case involving the English dataset mentioned in Section 4.3 (Figure 9).

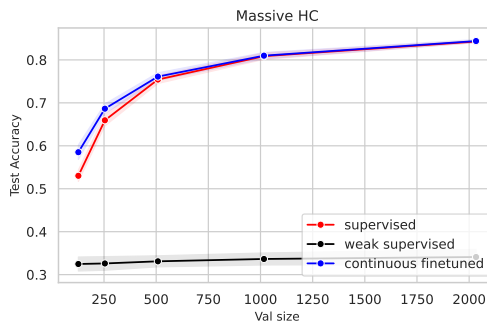

Figure 8: Massive dataset with higher cardinality (60)

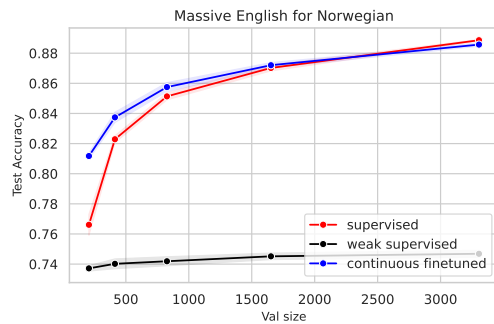

Figure 9: Using English text as an augmented data for Norwegian Bert

515

## 516 **J Links to datasets & metadata**

517 We noted that all the datasets that we used are based on previously publicly published datasets.  
518 The license and links are mentioned in Appendix A. In addition to the original link for the datasets  
519 mentioned in Appendix A. We also provide our own usage of the datasets on GoogleDrive.

## 520 **K Dataset Format**

521 The dataset uses the same format as the WRENCH Zhang et al. [2021] benchmark. For each dataset  
522 directory, there are four `.json` files for training data, validation data, test data, and labels respectively.  
523 For the label file, the labels are organized in the following format:

```
524     {  
525     Label index: Label name,  
526     ...  
527 }
```

528 For the dataset files, the data points are organized in the following format:

```
529     {  
530     Data index: {  
531         "labels": Label index,  
532         "weak_labels": [-1, -1, ...],  
533         "data": {  
534             "text": Data Content,  
535             ...,  
536             More content depending on the datasets  
537         }  
538     }
```

## 539 **L Long-term Preservation**

540 The datasets will be hosted indefinitely at the provided link.

## 541 **M Explicit License**

542 Our license is CC BY 4.0 license and otherwise inherits the licensing of original datasets.

## 543 **N Structured Metadata**

544 We also provided our datasets on HuggingFace, and the metadata are contained in the **README.md**  
545 for each dataset.

## 546 **O Other Sources**

547 Our code is maintained on GitHub.
